# Supplementary material for: Socioeconomic inequalities in primary-care and specialist physician visits: a systematic review
Source: Springer Nature journal article supplement (doi:10.1186/s12939-020-01375-1), 2021-02-10
Supplement: MOESM1 [file 18852580]

## **Additional file 1** Search strategy

### **Medline**

Search ((((((((((inequit\*[Title/Abstract]) OR inequal\*[Title/Abstract]) OR differences[Title/Abstract]) OR disparit\*[Title/Abstract]) OR equit\*[Title/Abstract]) OR equalit\*[Title/Abstract])))))) AND ((((((((((socioeconomic[Title/Abstract]) OR socio-economic[Title/Abstract]) OR education\*[Title/Abstract]) OR income[Title/Abstract]) OR "social class"[Title/Abstract]) OR occupation\*[Title/Abstract] OR depriv\*[Title/Abstract]) OR area[Title/Abstract]) OR poverty[Title/Abstract])))))) AND ((((((((((("General practitioner\*" [Title/Abstract]) OR "family doctor\*" [Title/Abstract]) OR "primary care physician\*" [Title/Abstract]) OR "family physician\*" [Title/Abstract]) OR "GP\*" [Title/Abstract]) OR "primary physician\*" [Title/Abstract]) OR "family practitioner\*" [Title/Abstract]) OR "attending physician\*" [Title/Abstract]) OR "medical specialist\*" [Title/Abstract]) OR "consultant\*" [Title/Abstract]) OR "specialist physician\*" [Title/Abstract])))) Filters: Publication date from 2004/01/01 to 2018/12/31; English; German

### **Web of Science**

# 1 TI=(inequit\*) OR TI=(inequal\*) OR TI=(differences) OR TI=(disparit\*) OR TI=(equit\*) OR TI=(equalit\*)

# 2 TI=(socioeconomic) OR TI=(socio-economic) OR TI=("social class") OR TI=(occupation\*) OR TI=(income) OR TI=(education\*) OR TI=(poverty) OR TI=(depriv\*) OR TI=(area)

# 3 TI=("General practitioner\*") OR TI=("family doctor\*") OR TI=("primary care physician\*") OR TI=("family physician\*") OR TI=(GP) OR TI=("primary physician\*") OR TI=("family practitioner\*") OR TI=("attending physician\*") OR TI=("medical specialist\*") OR TI=(consultant\*) OR TI=("specialist physician\*")

#3 AND #2 AND #1

Refined by: LANGUAGES: ( ENGLISH OR GERMAN )

Timespan=2004-2018

Search language=Auto
