# Supplementary material for: Socioeconomic inequalities in primary-care and specialist physician visits: a systematic review
Source: Springer Nature journal article supplement (doi:10.1186/s12939-020-01375-1), 2021-02-10

**Additional file 2a** Socioeconomic differences in the probabilities of utilizing primary-care and specialist physicians subdivided for different time periods of utilization (≤6 months compared to 12-24 months)

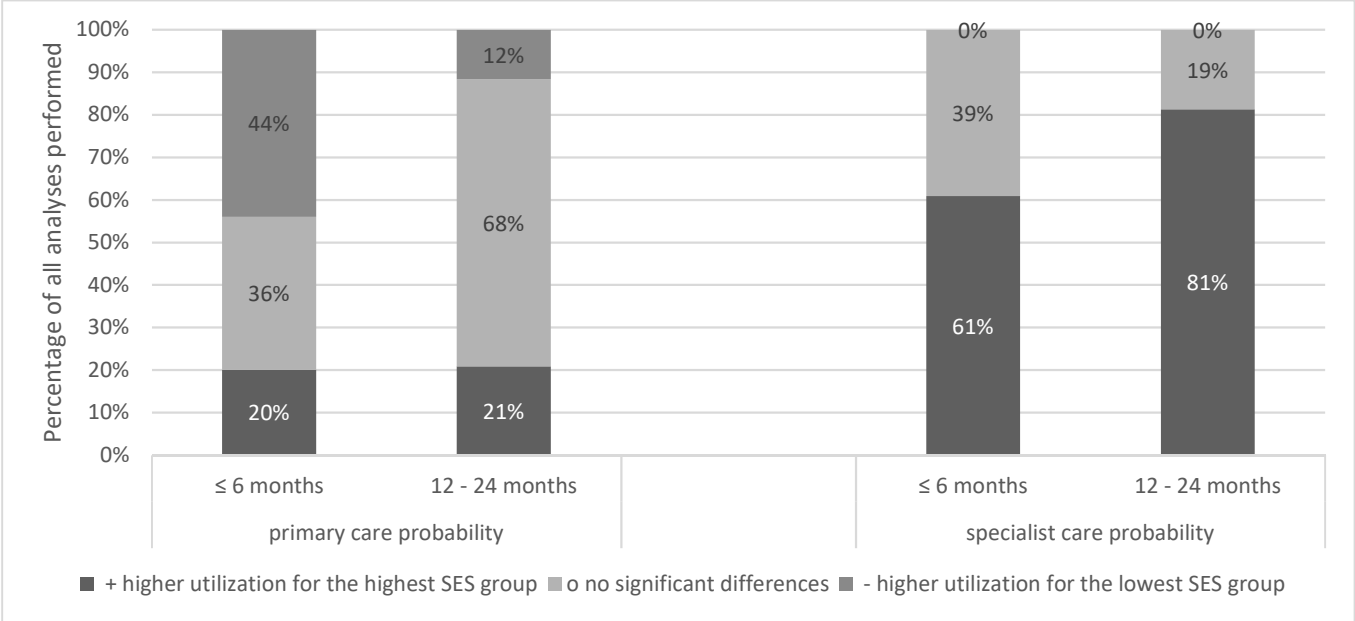

**Additional file 2b** Socioeconomic differences in the utilization of primary-care and specialist physicians subdivided for the different measures of socioeconomic status (income compared to education)

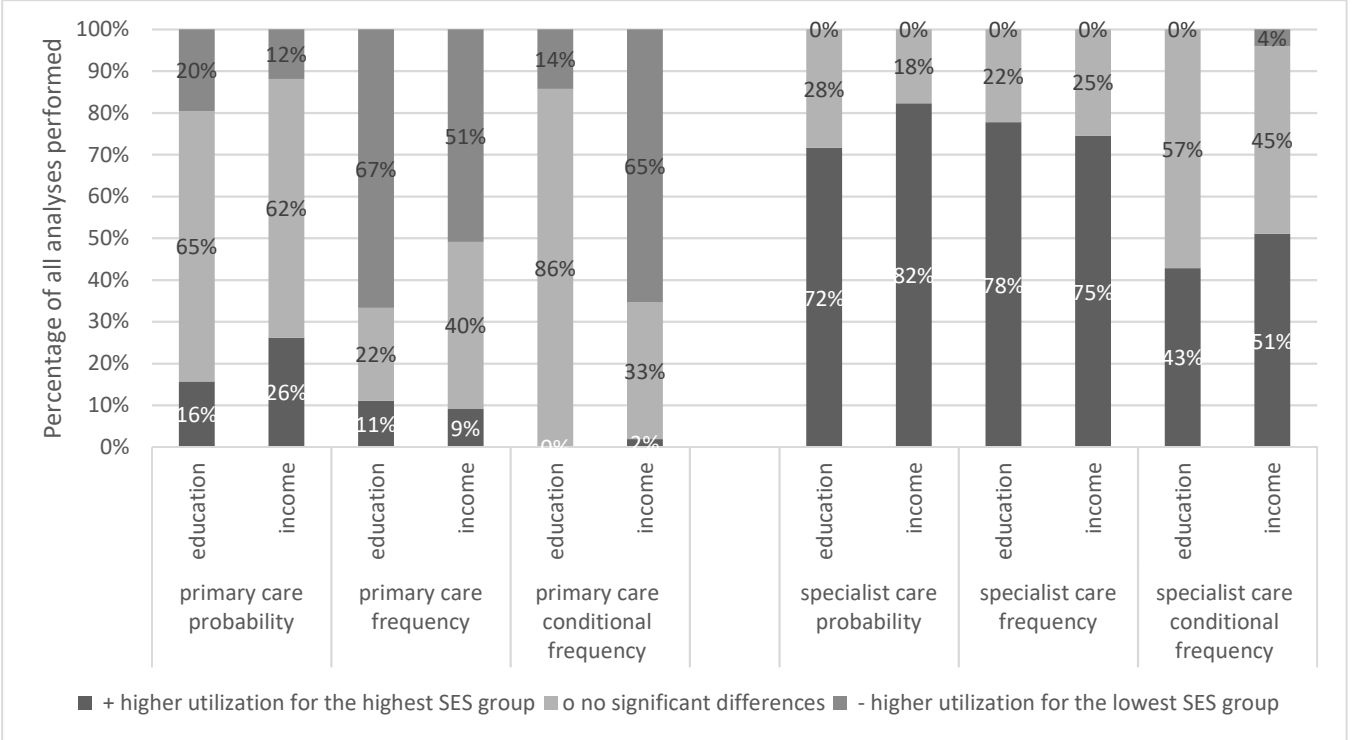

Supplement: MOESM2 [file 18852580]
