# Supplementary material for: Socioeconomic inequalities in primary-care and specialist physician visits: a systematic review
Source: Springer Nature journal article supplement (doi:10.1186/s12939-020-01375-1), 2021-02-10
Supplement: MOESM3 [file 18852580]

### Additional file 3a Results of the risk of Bias evaluation

| Author                                  | Year | #1    | #2    | #3    | #4    | #5    | #6    |
|-----------------------------------------|------|-------|-------|-------|-------|-------|-------|
| Abasolo, Saez, López-Casasnovas[23]     | 2017 | Green | Red   | Green | Green | Red   | Red   |
| Agerholm et al.[15]                     | 2013 | White | Green | Green | Green | Red   | Green |
| Allin[24]                               | 2008 | Green | Green | Green | Green | Green | Green |
| Asada, Kephart[25]                      | 2007 | White | Green | Green | Green | Green | Green |
| Bago d'Uva, Jones, van Doorslaer[26]    | 2009 | Green | Green | Green | Green | White | Green |
| Baron-Epel, Garty, Green[27]            | 2007 | Green | Green | Green | Green | Red   | Green |
| Beckman, Anell[28]                      | 2013 | Green | Red   | Green | Green | Green | Green |
| Bergmann, Kalcklösch, Tiemann[29]       | 2005 | Red   | Green | Green | Green | Green | Green |
| Bourke[30]                              | 2009 | Green | Green | Green | Green | White | Green |
| Bremer, Wübker[31]                      | 2013 | Green | Green | Green | Green | Green | Green |
| Bremer, et al.[32]                      | 2018 | Green | Green | Green | Green | Red   | Green |
| Crespo-Cebada, Urbanos-Garrido[33]      | 2012 | Green | Green | Green | Green | White | Green |
| Devaux, de Looper[34]                   | 2012 | Green | Green | Green | Green | Green | Green |
| Fjaer, et al.[35]                       | 2017 | White | Green | Green | Green | Red   | Green |
| Garrido-Cumbrera, et al.[36]            | 2010 | Green | Green | Green | Green | White | Green |
| Glazier et al[37]                       | 2009 | White | Green | Green | Green | Red   | Green |
| Gonzalez-Alvarez, Barranquero[38]       | 2009 | Green | Green | Green | Green | White | Green |
| Grasdal, Monstad[39]                    | 2011 | Green | Green | Green | Green | Red   | Green |
| Gruber, Kiesel[40]                      | 2010 | Green | Green | Green | Green | Red   | Green |
| Habicht, Kunst[41]                      | 2005 | White | Green | Green | Green | Red   | Green |
| Hansen, et al.[42]                      | 2012 | Green | Green | Green | Green | White | Green |
| Hoebel, et al.[12]                      | 2016 | Green | Green | Green | Green | Red   | Green |
| Hoeck, et al.[43]                       | 2011 | Green | Green | Green | Green | White | Green |
| Hoeck, et al.[44]                       | 2013 | Green | Green | Green | Green | Green | Green |
| Korda, et al.[45]                       | 2009 | White | Green | Green | Green | Green | Green |
| La Parra-Casado, et al.[46]             | 2018 | Green | Green | Green | Green | White | Green |
| Lichte[47]                              | 2017 | Green | Green | Green | Green | Green | Green |
| Lostao, et al.[48]                      | 2011 | Green | Green | Green | Green | Green | Green |
| Lu, et al.[49]                          | 2007 | Green | Green | Green | Green | White | Green |
| Masseria, Giannoni[50]                  | 2010 | Green | Green | Red   | Green | White | Green |
| McDonald, Conde[51]                     | 2010 | White | Green | Green | Green | White | Green |
| Mosquera, et al.[52]                    | 2017 | Green | Green | Green | Green | White | Green |
| Nolan[53]                               | 2007 | Green | Green | Green | Green | Red   | Green |
| Palència, et al.[54]                    | 2013 | Green | Green | Green | Green | Red   | Green |
| Põlluste, Kalda, Lember[55]             | 2009 | Green | Green | Green | Green | Red   | Green |
| Rattay et. al.[56]                      | 2013 | Green | Red   | Green | Green | Red   | Green |
| Regidor, et al.[57]                     | 2008 | White | Green | White | Green | White | Green |
| Reibling, Wendt[58]                     | 2010 | Green | Green | Green | Green | White | Green |
| Rogowski et al.[59]                     | 2008 | Green | Green | Green | Green | Green | Green |
| Ryvicker, Gallo, Fahs[60]               | 2012 | Green | Green | Green | Green | Red   | Green |
| San Sebastian, Mosquera, Gustafsson[61] | 2017 | White | Green | Green | Green | White | Green |
| Schnitzer, et al.[62]                   | 2011 | Red   | Green | Green | Green | Red   | Green |
| Schulz[63]                              | 2016 | Green | Green | Green | Green | White | Green |
| Stirbu, et al.[11]                      | 2011 | Green | Green | Green | Green | White | Green |
| Suominen-Taipale, et al.[64]            | 2004 | Green | Green | Green | Green | Red   | Green |
| Tavares, Zantomio[65]                   | 2017 | Green | Green | Green | Green | White | Green |
| Terraneo[10]                            | 2015 | Green | Green | Green | Green | Red   | Green |
| Thode et al.[66]                        | 2005 | Green | Green | Green | Green | White | Green |
| Tille, et al.[67]                       | 2017 | Green | Green | Green | Green | Red   | Green |
| van Doorslaer, Koolman, Jones[68]       | 2004 | Green | Green | Green | Green | White | Green |
| van Doorslaer, Masseria, Koolman[69]    | 2006 | Green | Green | Green | Green | White | Green |
| van Oortij[70]                          | 2004 | Green | Green | Green | Green | Red   | Green |
| Vasquez, Paraje, Estay[71]              | 2013 | Green | Green | Green | Green | White | Green |
| Vedsted et al.[72]                      | 2004 | White | Green | Green | Green | White | Green |
| Vedsted, Olesen[73]                     | 2005 | White | Green | Green | Green | Red   | Green |
| Vikum, et al.[74]                       | 2013 | Green | Green | Green | Green | Red   | Green |
| Vikum, Krokstad, Westin[75]             | 2012 | Green | Green | Green | Green | Red   | Green |

#1 selection of participants; #2 confounding variables; #3 measurement of exposure; #4 blinding of outcome measure. #5 incomplete outcome data; #6 selective outcome reporting.

Green, low risk of bias; white, unclear risk of bias; red, high risk of bias

**Additional file 3b** Evaluation of each of the six domains of the risk of bias assessment

|    |                                                                                    |
|----|------------------------------------------------------------------------------------|
| #1 |  |
| #2 |  |
| #3 |  |
| #4 |  |
| #5 |  |
| #6 |  |

#1 selection of participants; #2 confounding variables; #3 measurement of exposure; #4 blinding of outcome measure. #5 incomplete outcome data; #6 selective outcome reporting.

Green, low risk of bias; white, unclear risk of bias; red, high risk of bias
